# Supplementary material
Source: PubMed Central journal article supplement (PMC4211076)

# Supplementary Figure 1.

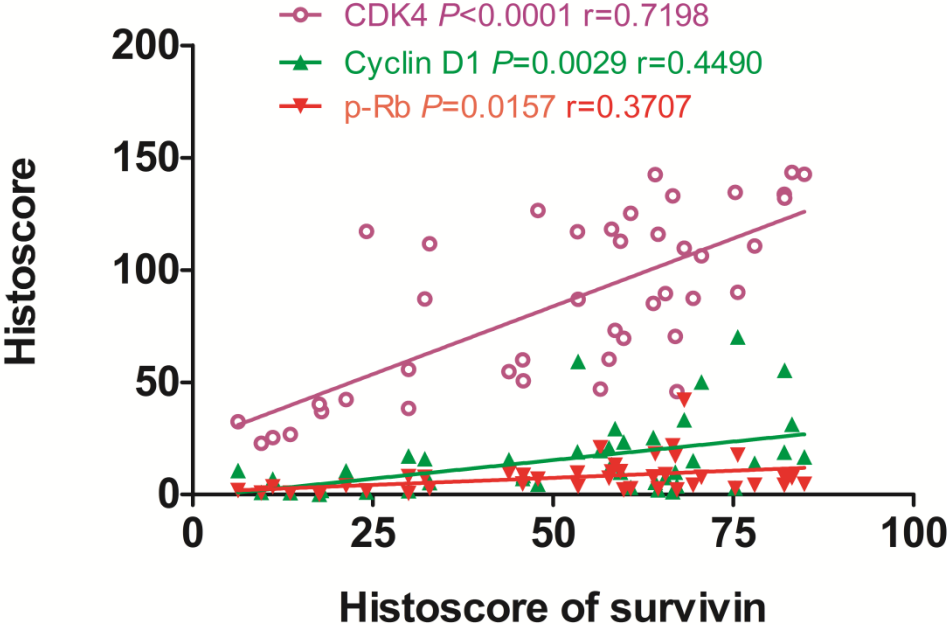

## Supplementary Figure 2.

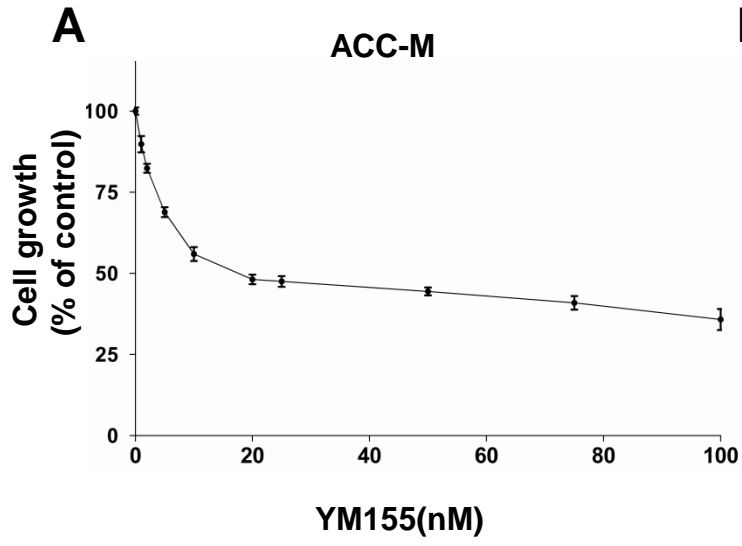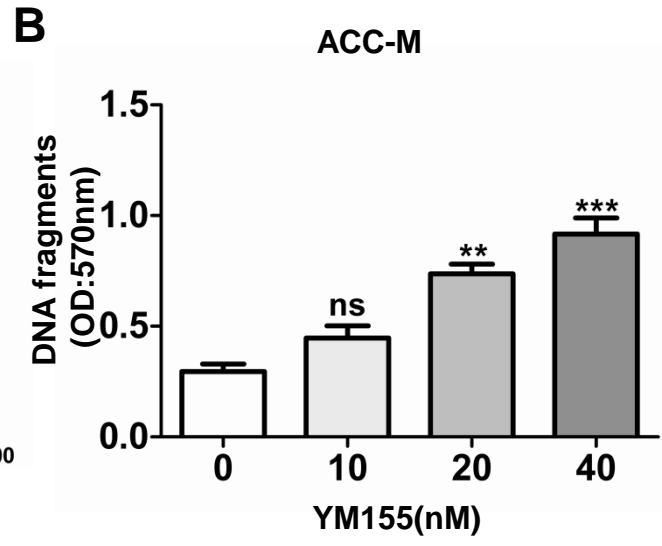

Supplement: NIHMS624809-supplement-Supplementary_Figures.pdf [file NIHMS624809-supplement-Supplementary_Figures.pdf]
